# Supplementary material for: Single-Cell RNA Sequencing Reveals the Immunological Profiles of Renal Allograft Rejection in Mice
Source: PubMed Central journal article supplement (PMC8340022; doi:10.3389/fimmu.2021.693608), 2021-07-22
Supplement: DataSheet_1.pdf [file DataSheet_1.pdf]

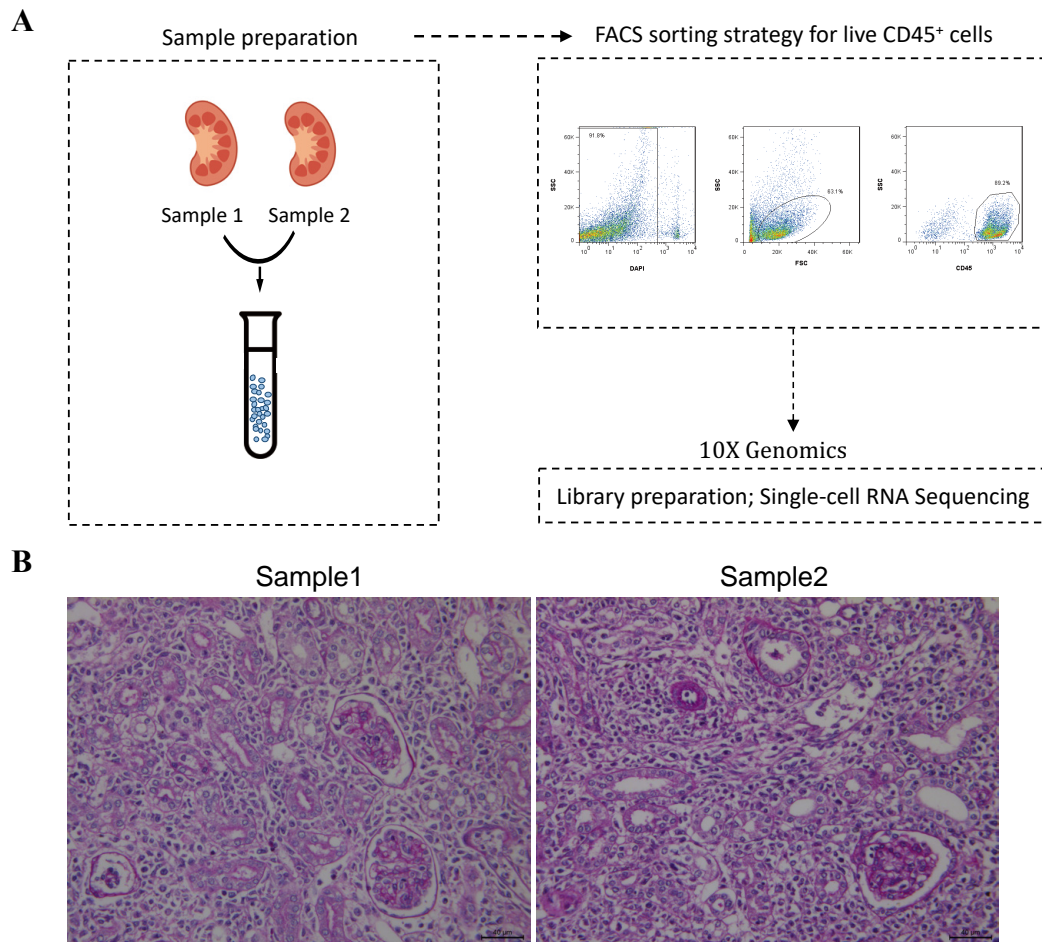

**Supplementary Figure 1. (A)** Graphical representation of the scRNA sequencing experimental setup. Samples were isolated from kidney grafts of recipient mice 7 days after surgery. Two samples were pooled. **(B)** Representative photomicrographs showing histopathology (by PAS staining) of the kidneys harvested from recipient mice used for scRNA-seq analysis. Scale bar: 40  $\mu$ m.

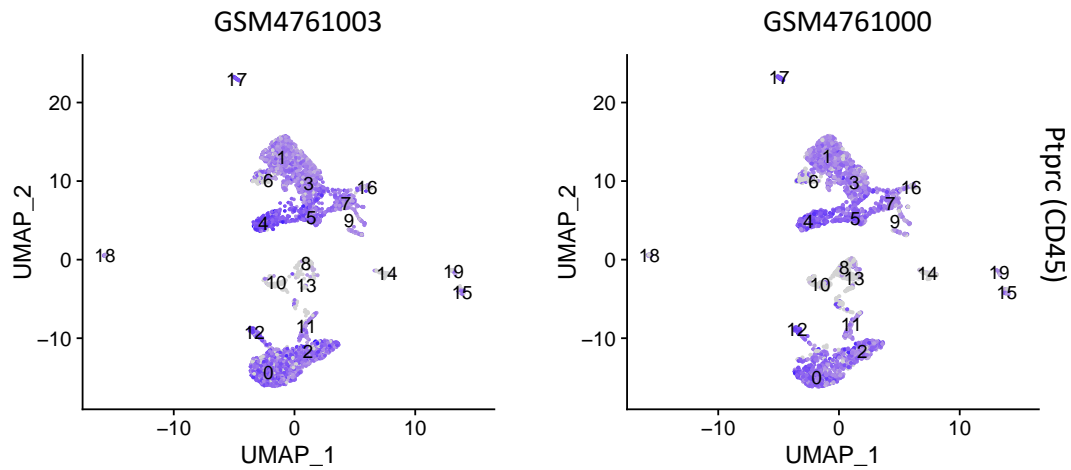

**Supplementary Figure 2.** Feature plot of Ptprc (coding CD45) expression level in cell clusters identified in data set GSM4761003 and GSM4761000. Cluster 0:7, 9, 11, 12, 15:19 were extracted as leukocytes.

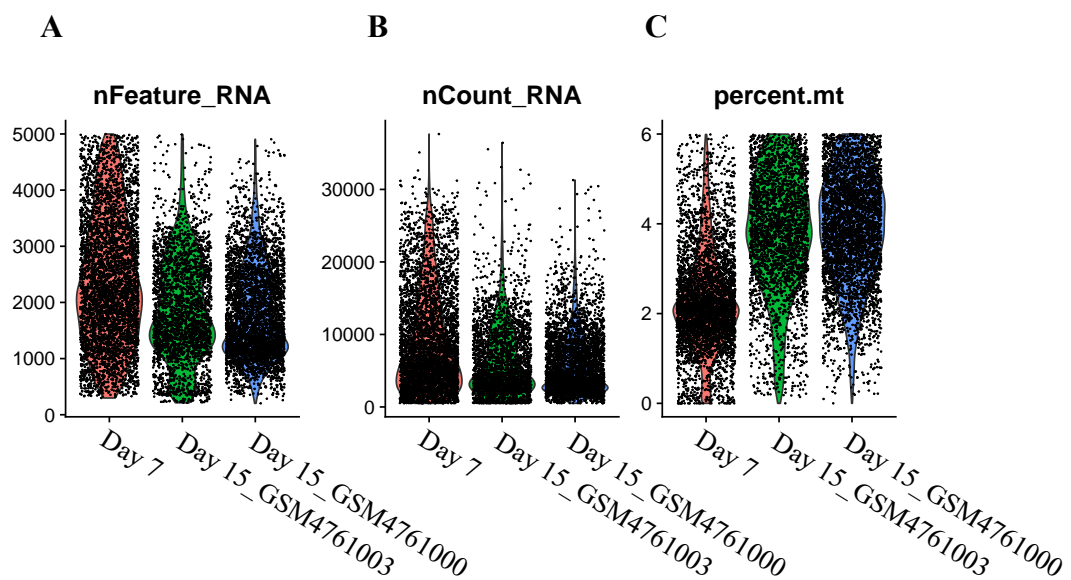

**Supplementary Figure 3.** Violin plot showing quality control results. The number of genes detected in each cell (A), the total number of molecules detected within a cell (B) and the percentage of mitochondrial gene detected in each cell (C) after quality control.

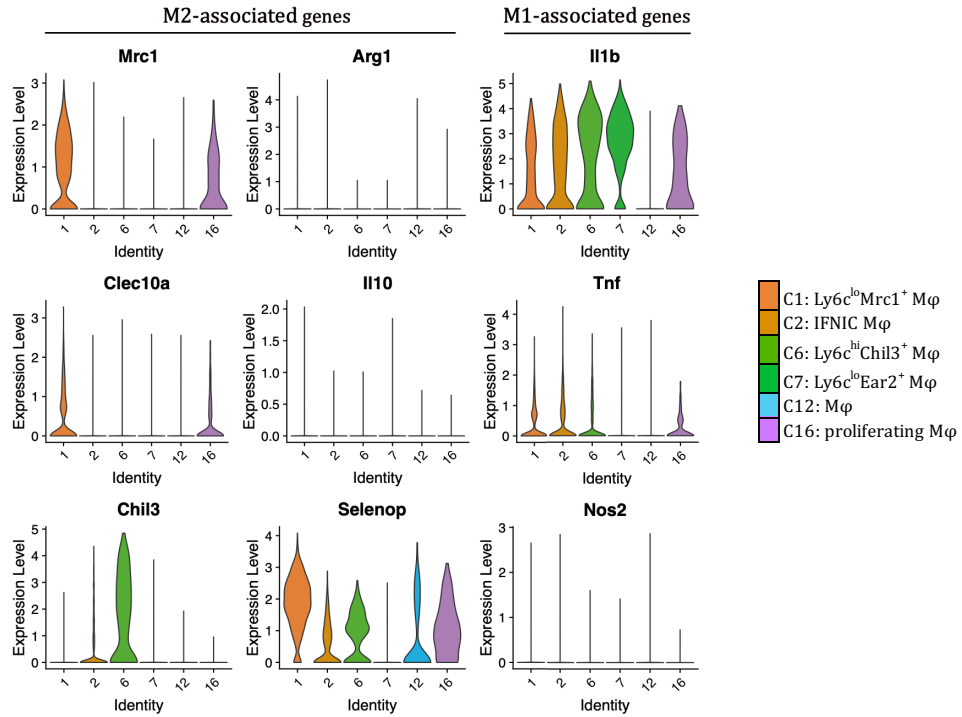

**Supplementary Figure 4.** Violin plot showing normalized expression levels of the M1 and M2 markers in macrophage subtypes. Cell identities are annotated on the right.

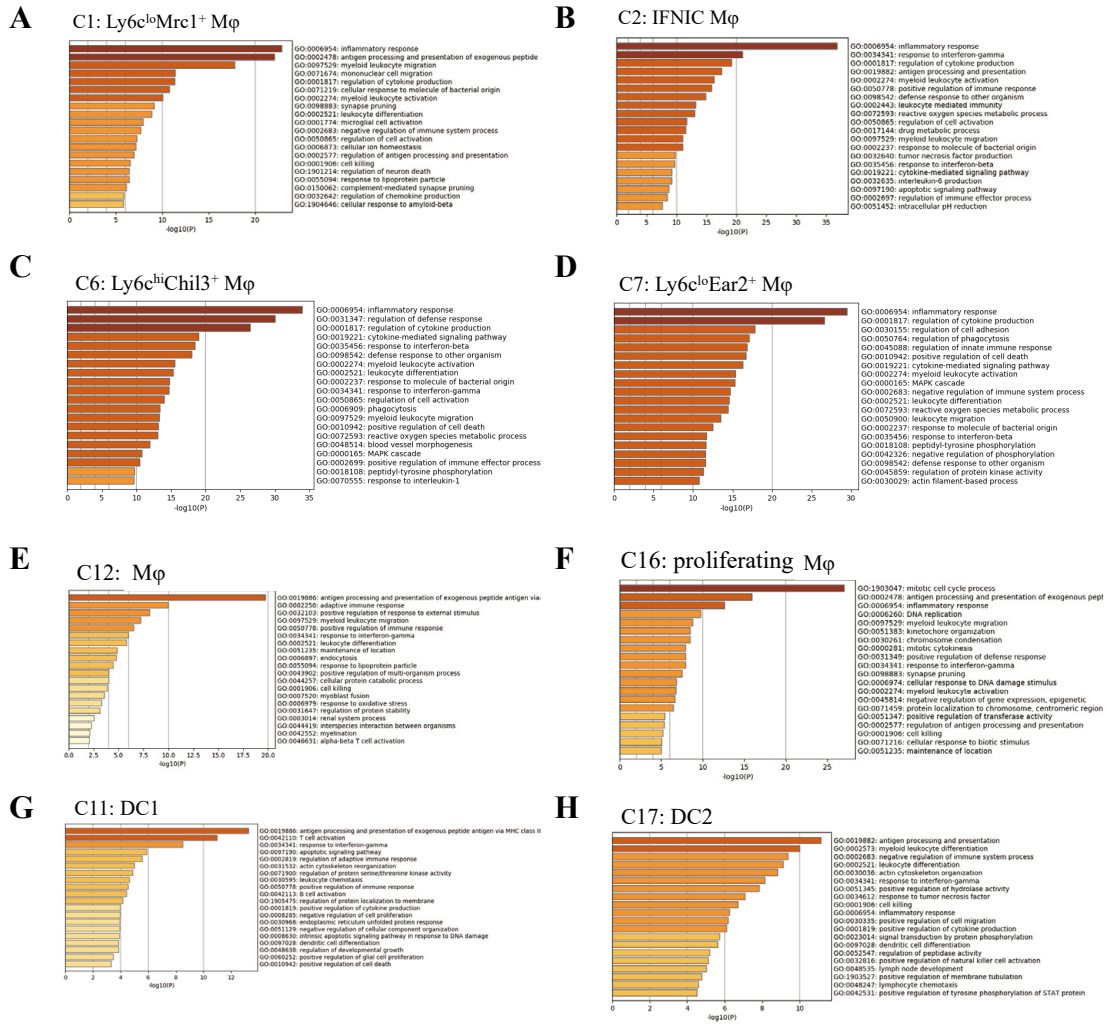

**Supplementary Figure 5.** Top 20 enriched gene ontology pathways in each macrophage cluster (A-F) and cDC cluster (G, H) as calculated by metaspice. Only marker genes with average  $\log_2FC > 0.59$  were used for enrichment analysis. Mφ, macrophage; cDC, classical dendritic cell; FC, fold change.



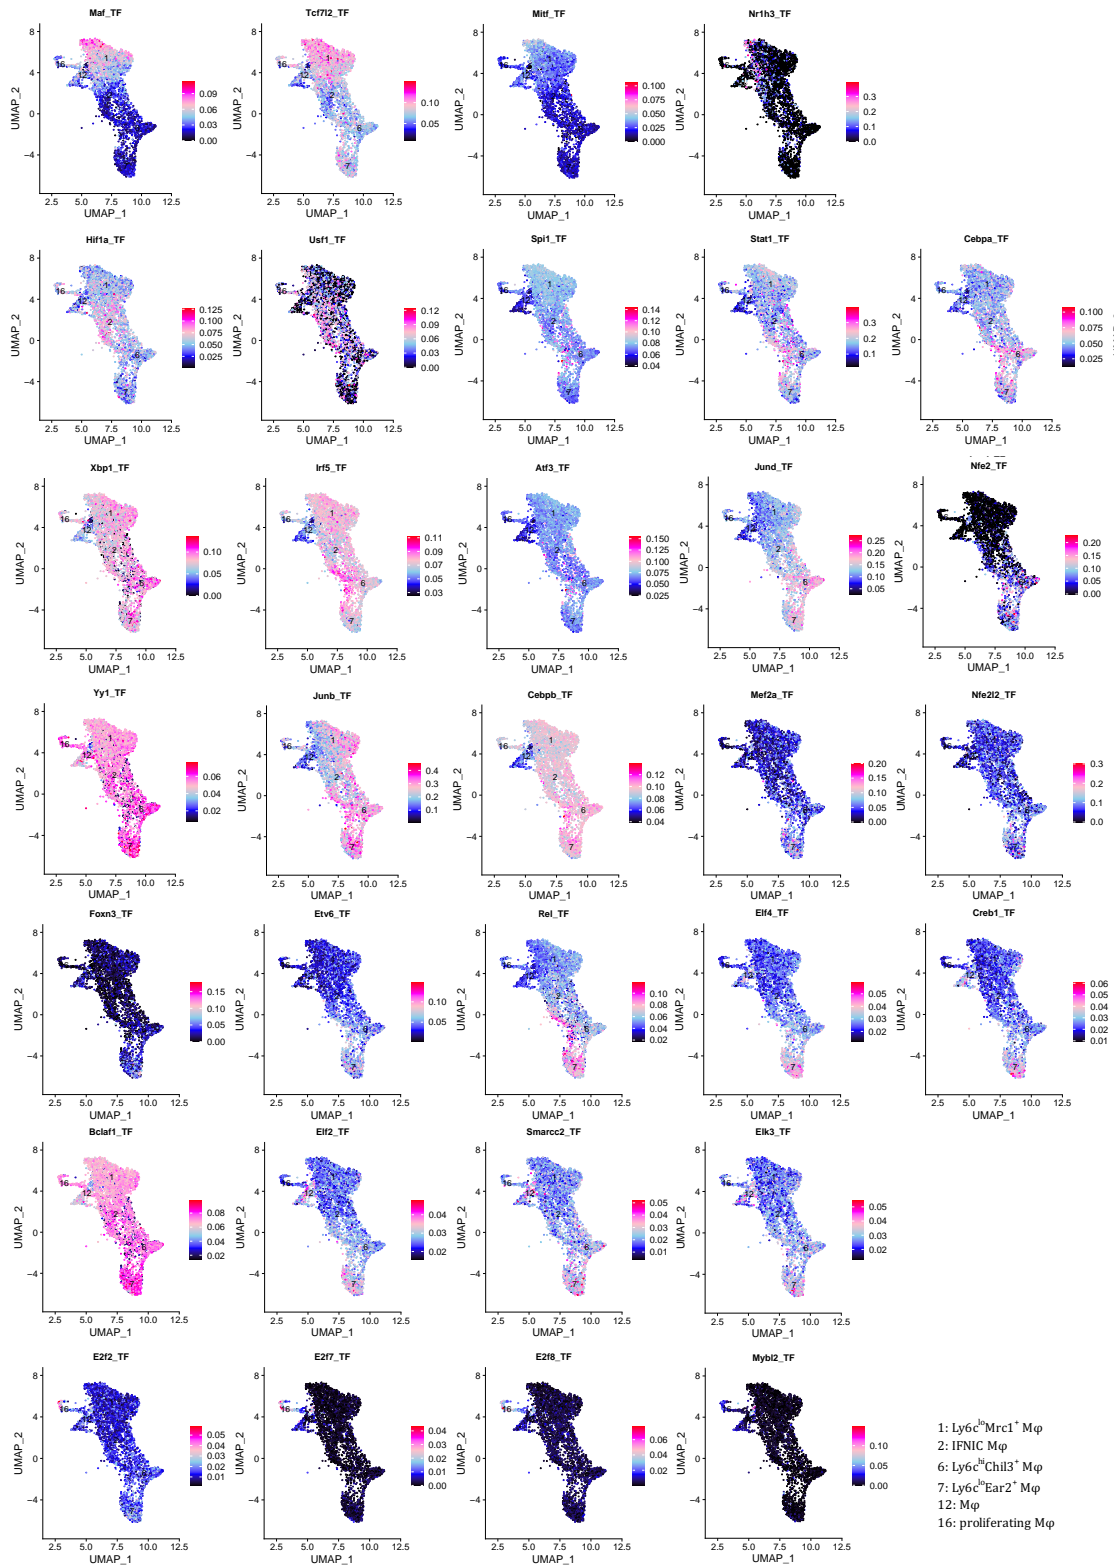

**Supplementary Figure 6.** Gene regulatory networks in macrophages subtypes. Featureplot of the area under the curve scores for the expression of gene sets regulated by transcription factors, as estimated with SCENIC, in each macrophage cluster. AUC score bar is shown on the right. Cell identities are annotated in the lower right corner SCENIC, single-cell regulatory network inference and clustering; AUC, area under the curve.



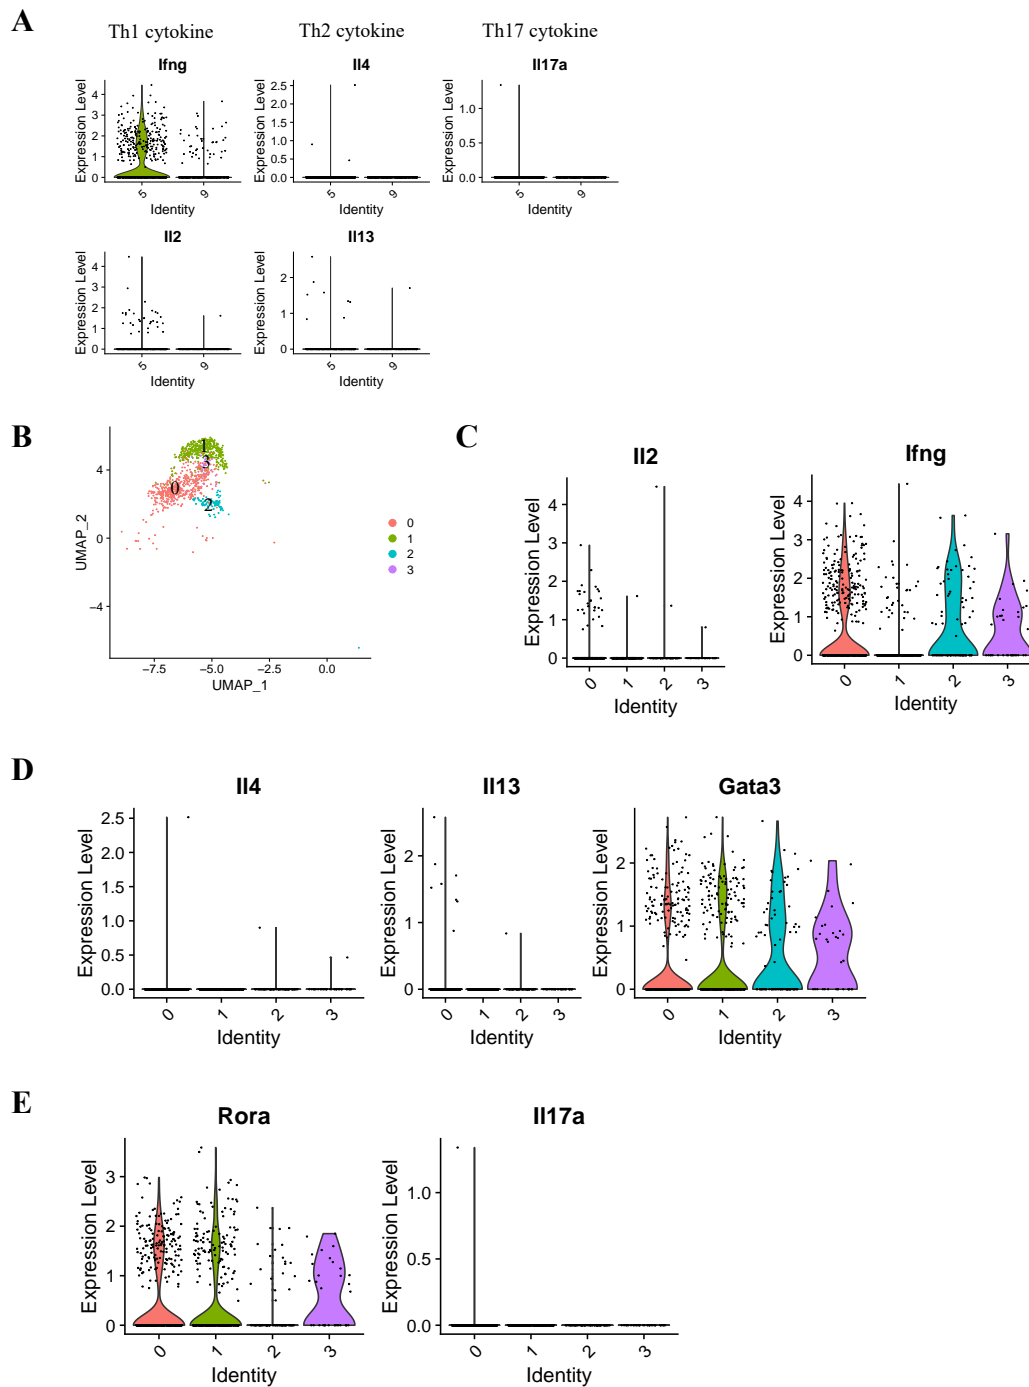

**Supplementary Figure 8.** (A) Violin plot showing normalized expression levels of the helper T cell markers in CD4<sup>+</sup> T cell subtypes. (B) Integrated umap plot of CD4<sup>+</sup> T cells re-clustered at higher resolution. Each dot depicts a single cell, colored according to cluster designation. Violin plots showing normalized gene expression level of (C) Th1, (D) Th2 and (E) Th17 markers.

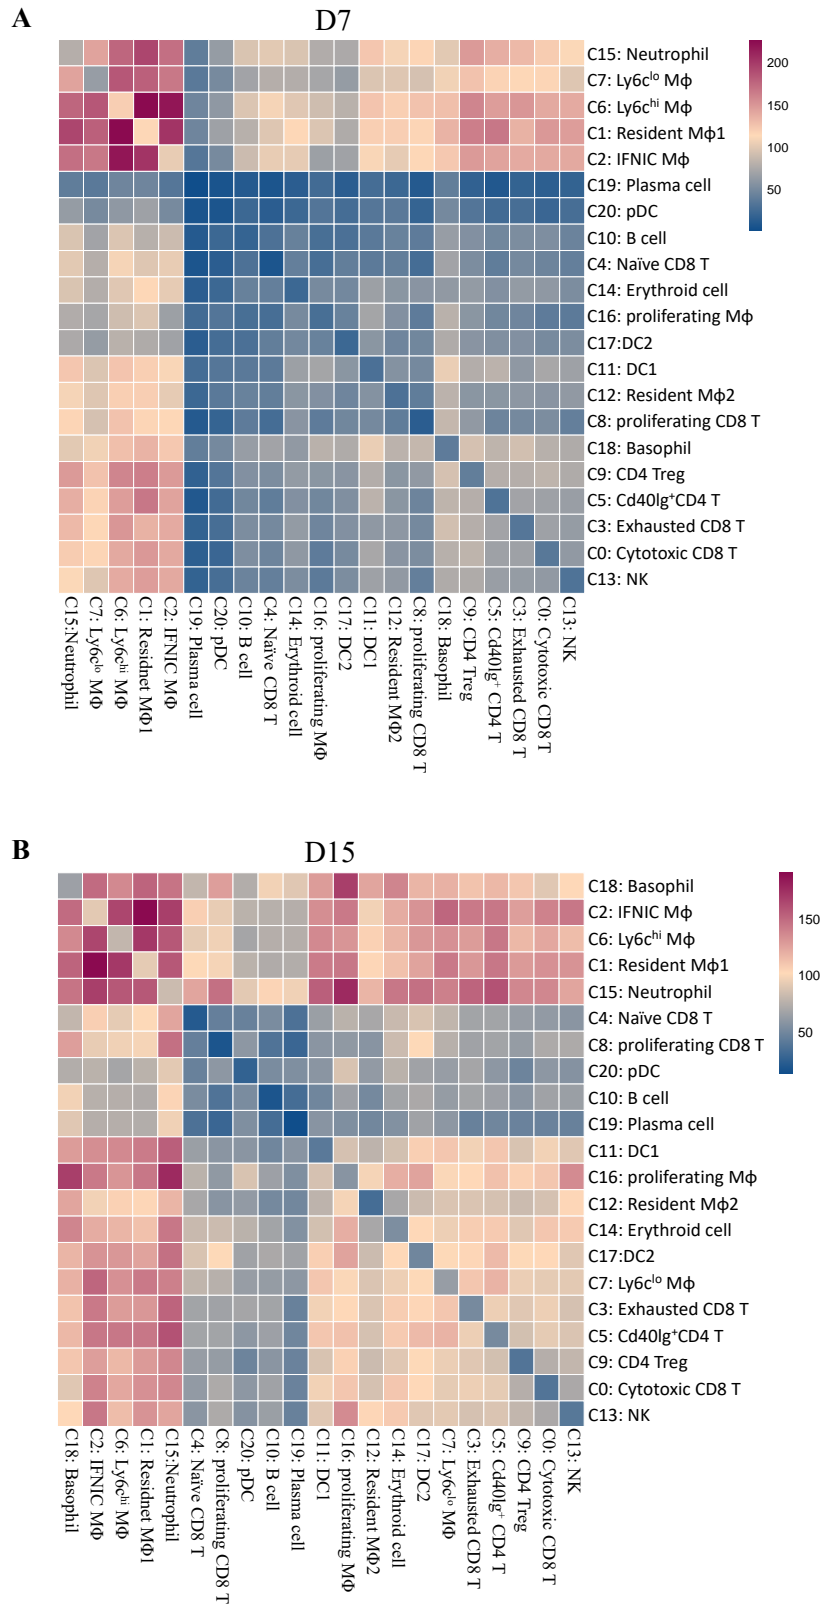

**Supplementary Figure 9.** Myeloid cells harbored the richest cell-cell interactions. Heatmaps showing capacity for intercellular communication between every two immune cell clusters on D7 (**A**) and D15 (**B**). Color from blue to red indicates the number of LR pairs from low to high. D7, 7 days following transplantation; D15, 15 days following transplantation; LR, ligand and receptor.

**A**

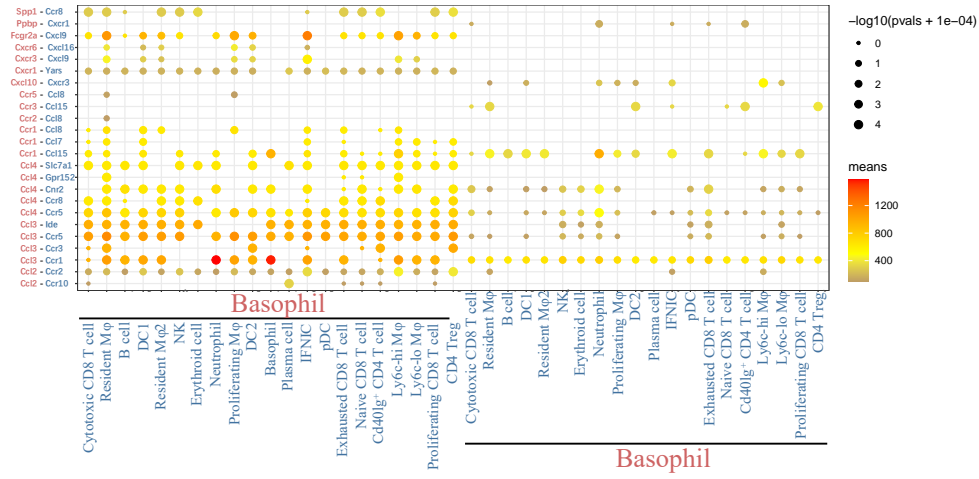

**Basophil**

**Basophil**

**B**

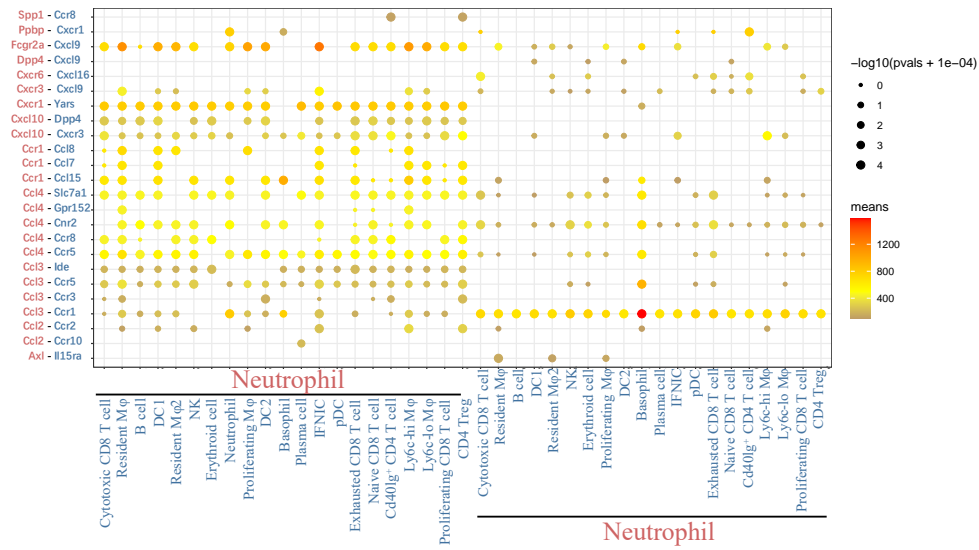

**Neutrophil**

**Neutrophil**

**C**

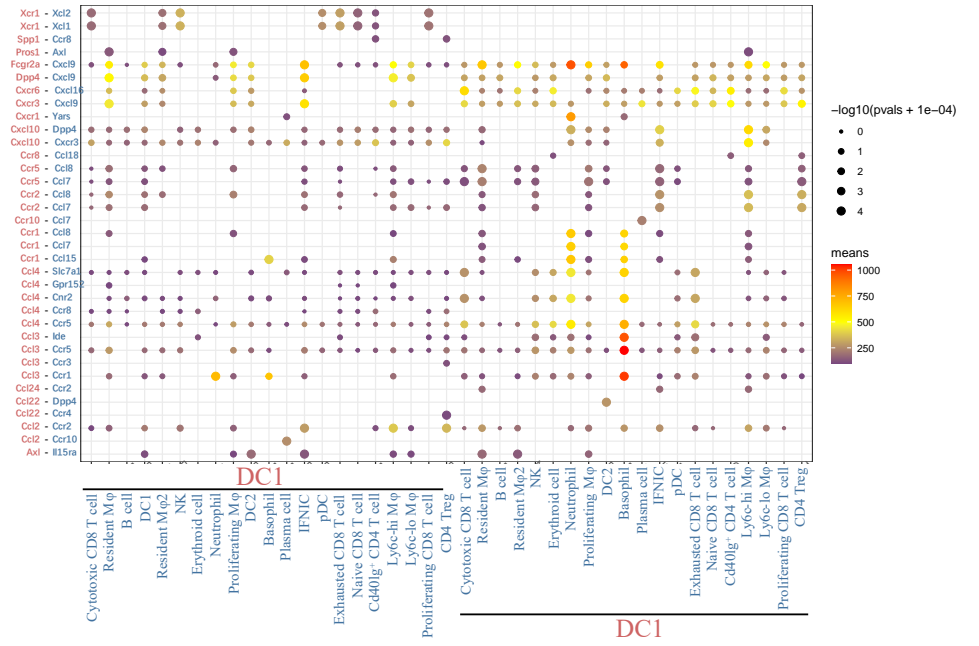

**DC1**

**DC1**

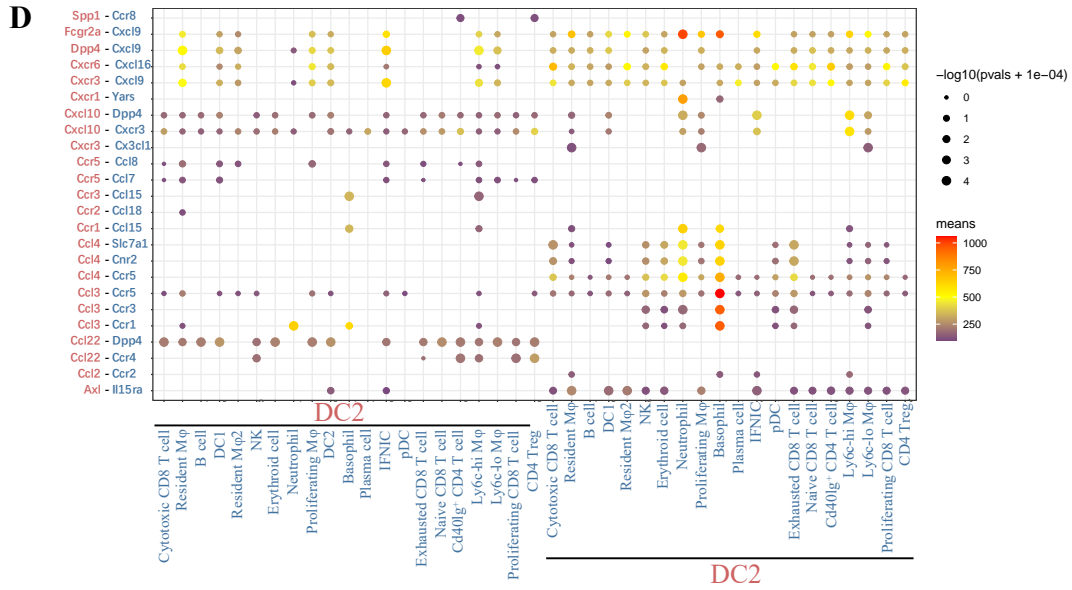

**Supplementary Figure 10. (A-D)** Overview of chemokine mediated LR interactions between granulocytes/DCs and other immune cell clusters. P values are indicated by circle size, with the scale to the right (permutation test). The means of the average expression levels of interacting molecule 1 in cluster 1 and interacting molecule 2 in cluster 2 are indicated by color. Assays were carried out at the mRNA level but were used to extrapolate protein interactions. Only LR pairs with means value > 100 are shown. DCs, dendritic cells; LR, ligand and receptor.

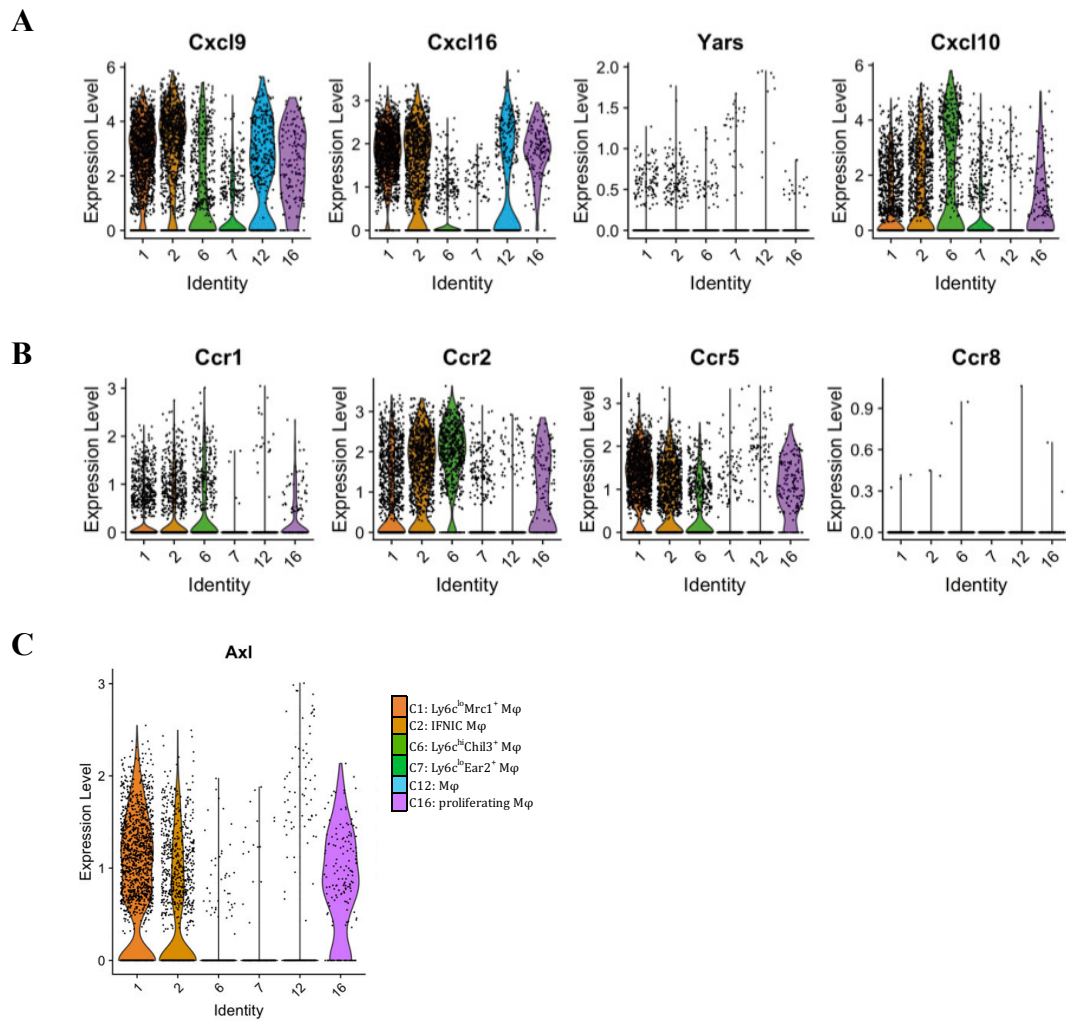

**Supplementary Figure 11.** Violin plot showing normalized gene expression level of (A) ligands Cxcl9, Cxcl16, Yars and Cxcl10, (B) receptors Ccr1, Ccr2, Ccr5 and Ccr8, (C) Axl in macrophage clusters. Mφ, macrophage.



Table S1. Summary of 20 major immune cell types in murine acute T-cell mediated kidney allograft rejection

| Cell Cluster (Naming)                                   | Marker genes                               | Transcription factors                                       | Major functions                                                                                                                                                     | Count/Fraction of immune cells |                  |
|---------------------------------------------------------|--------------------------------------------|-------------------------------------------------------------|---------------------------------------------------------------------------------------------------------------------------------------------------------------------|--------------------------------|------------------|
|                                                         |                                            |                                                             |                                                                                                                                                                     | Day 7<br>(3977)                | Day 15<br>(6944) |
| Cluster 0<br>(cytotoxic CD8 T cell)                     | Cd8a, Cd8b1, Nkg7,<br>Gzmb, Ifng, Cxcr6    | Pbx1, Sp4,<br>Usf2, Runx3                                   | T cell activation, antigen receptor-mediated signaling pathway, interferon-gamma production                                                                         | 799<br>(20.09%)                | 1269<br>(18.27%) |
| Cluster 1<br>(Ly6c <sup>lo</sup> Mrc1 <sup>+</sup> Mφ)  | C1qa, C1qb, C1qc,<br>Cd81, Adgre1, Apoe    | Maf, Tcf7l2,<br>Mitf, Nr1h3                                 | Inflammatory response, macrophage activation antigen processing and presentation, receptor-mediated endocytosis, MAPK cascade, chemokine-mediated signaling pathway | 167<br>(4.20%)                 | 1309<br>(18.85%) |
| Cluster 2<br>(Ly6c <sup>inter</sup> Mφ)                 | Aif1, Cxcl9, Ly6i,<br>Saa3, Cfb, Lyz2      | Usf1, Spi1,<br>Hif1a, stat1                                 | Inflammatory response, response to interferon-γ, antigen processing and presentation, reactive oxygen species metabolic process                                     | 283<br>(7.12%)                 | 816<br>(11.75%)  |
| Cluster 3<br>(exhausted CD8 T cell)                     | Cd8a, Cd8b1, Pdcd1,<br>Lag3, Havcr2        | Foxn2                                                       | T cell activation, adaptive immune response                                                                                                                         | 473<br>(11.89%)                | 364<br>(5.24%)   |
| Cluster 4<br>(Naive CD8 T cell)                         | Cd8a, Cd8b1, Tcf7,<br>Lef1, IL7r, Ms4a4b   | Runx1, Foxo1,<br>Ets2, Elf1, Jun                            | Translation                                                                                                                                                         | 446<br>(11.21%)                | 258<br>(3.72%)   |
| Cluster 5<br>(Cd40lg <sup>+</sup> CD4 T cell)           | Cd4, Cd40lg, Icos,<br>Tnfrsf18, Ifng       | Gata3                                                       | T cell activation, regulation of cytokine production                                                                                                                | 272<br>(6.84%)                 | 348<br>(5.01%)   |
| Cluster 6<br>(Ly6c <sup>hi</sup> Chil3 <sup>+</sup> Mφ) | Ly6c2, Chil3, Plac8,<br>Hp, Ccr2, Vcan     | Cebpa, Xbp,<br>Irf5, Jun                                    | Inflammatory response, response to interferon-β, phagocytosis, chemokine-mediated signaling pathway, wound healing, cytokine-mediated signaling pathway             | 178<br>(4.48%)                 | 430<br>(6.19%)   |
| Cluster 7<br>(Ly6c <sup>lo</sup> Ear2 <sup>+</sup> Mφ)  | Ear2, Gngt2, Pou2f2,<br>Nr4a1, Ace, Cx3cr1 | Cebpb, Etv6,<br>Rel, Elf4, Elf2,<br>Creb1, Elk3,<br>Smarcc2 | Inflammatory response, cytokine-mediated signaling pathway, positive regulation of I-kappaB kinase/NF-kappaB signaling                                              | 110<br>(2.77%)                 | 498<br>(7.17%)   |
| Cluster 8<br>(proliferating CD8 T cell)                 | Cd8a, Cd8b1, Top2a,<br>Mki67, Pclaf        | E2f1, E2f2,<br>E2f7, E2f8,                                  | Mitotic cell cycle process                                                                                                                                          | 328<br>(8.25%)                 | 122<br>(1.76%)   |
| Cluster 9<br>(CD4 Treg)                                 | Cd4, Il2ra, Foxp3,<br>Ctla4, Il10          | Stat5a, Tgif1,<br>Cux1, Runx2                               | T cell activation, negative regulation of leukocyte activation, regulation of cytokine production                                                                   | 133<br>(3.34%)                 | 279<br>(4.02%)   |

|                                             |                                              |                             |                                                                                                                       |                |                |
|---------------------------------------------|----------------------------------------------|-----------------------------|-----------------------------------------------------------------------------------------------------------------------|----------------|----------------|
| Cluster 10<br>(B cell)                      | Cd79a, Cd79b, Ly6d                           | Tgif1, Foxo1,<br>Runx1, Jun | B cell activation, B cell differentiation, antigen<br>processing and presentation                                     | 312<br>(7.85%) | 96<br>(1.38%)  |
| Cluster 11<br>(DC_1)                        | Cd209a, Flt3, Kit                            | Pbx1, Irf5,<br>Hif1a, Cebpb | Antigen processing and presentation of exogenous<br>peptide antigen via MHC class II, response to<br>interferon-gamma | 36<br>(0.91%)  | 322<br>(4.64%) |
| Cluster 12<br>(Mφ2)                         | C1qa, C1qb, C1qc,<br>Cd81, Apoe, Aif1        | Nr1h3                       | Antigen processing and presentation                                                                                   | 91<br>(2.29%)  | 238<br>(3.43%) |
| Cluster 13<br>(NK cell)                     | Gzma, Klrb1c, Ncr1                           | Eomes, Irf8                 | Natural killer cell activation,<br>regulation of tumor necrosis factor production                                     | 130<br>(3.27%) | 141<br>(2.03%) |
| Cluster 15<br>(Neutrophil)                  | S100a9, Csf3r, Lcn2,<br>S100a8, Retnlg, Ly6g | Stat1, Ets2,<br>Cebpb       | Inflammatory response, regulation of cytokine<br>production, cytokine-mediated signaling pathway                      | 152<br>(3.82%) | 76<br>(1.09%)  |
| Cluster 16<br>(proliferating Mφ)            | Mki67, Top2a, C1qa,<br>Aif1, Cx3cr1          | E2f2, E2f7,<br>E2f8, Mybl2  | Mitotic cell cycle process,<br>antigen processing and presentation                                                    | 10<br>(0.25%)  | 148<br>(2.13%) |
| Cluster 17<br>(DC_2)                        | Fscn1, Cacnb3,<br>Mreg, Flt3                 | Rel, Relb,<br>Nfkb2, Stat5a | Dendritic cell differentiation,<br>antigen processing and presentation,<br>response to tumor necrosis factor          | 8<br>(0.20%)   | 92<br>(1.32%)  |
| Cluster 18<br>(Basophil)                    | Mcpt8, Il6,<br>Il4, Gata2                    | Gata1, Gata2,<br>Fos1       | Inflammatory response, response to wounding,<br>cytokine-mediated signaling pathway                                   | 9<br>(0.23%)   | 65<br>(0.94%)  |
| Cluster 19<br>(Plasma B cell)               | Jchain, Iglv1, Igkc,<br>Iglc1, Ighg2b        | Pbx1, Xbp1                  | Response to endoplasmic reticulum stress,<br>immunoglobulin mediated immune response                                  | 5<br>(0.13%)   | 56<br>(0.81%)  |
| Cluster 20<br>(pDC)                         | Siglech, Cox6a2,<br>Klra17                   | Runx2                       | Cytoplasmic translation                                                                                               | 35<br>(0.88%)  | 17<br>(0.24%)  |
| CD8 T cells<br>(cluster 0, 3, 4, 8)         | ...                                          | ...                         | ...                                                                                                                   | 51.44%         | 28.99%         |
| Monocyte/Mφ<br>(cluster 1, 2, 6, 7, 12, 16) | ...                                          | ...                         | ...                                                                                                                   | 21.11%         | 49.52%         |

Mφ, macrophage; DC, dendritic cell; NK, natural killer; pDC, plasmacytoid dendritic cell.

Table S2. Genes used for pseudotime gene variation analysis

| Gene Name | Gene Name | Gene Name |
|-----------|-----------|-----------|
| Cx3cr1    | Tmem176a  | Ly6c2     |
| Selenop   | Grn       | Anax2     |
| Vcam1     | Ctsh      | Myd88     |
| Maf       | Mif       | Ifi47     |
| Ccl7      | Tubb5     | Cxcl10    |
| Cadm1     | Cxcl9     | Alox5ap   |
| Adgre1    | Ass1      | Socs3     |
| Mrc1      | Cfb       | Plaur     |
| Apoe      | Saa3      | Plac8     |
| Ctsb      | Eno1      | Ifitm3    |
| Itm2b     | Nme2      | Ifitm2    |
| Ccl8      | Ccr2      | Irf1      |
| Lgmn      | Cd40      | Lsp1      |
| Ckb       | Isg15     | Clec4e    |
| Cd81      | Upp1      | Gpx1      |
| Cd72      | Il1rn     | Nfkbia    |
| Acp5      | Prdx5     | Pou2f2    |
| Cd63      | Sod2      | Cytip     |
| Fabp5     | Ly6i      | Ace       |
| H2-M2     | Zbp5      | Klf2      |
| Ccl12     | F10       | Gngt2     |
| Mafb      | Gbp2      | Rel       |
| Ctss      | S100a10   | Nr4a1     |
| Ctsl      | S100a6    | Itga4     |
| Cstd      | S100a11   | Btg1      |
| C1qb      | Tgtp1     | Ear2      |
| C1qc      | Socs1     | Atf3      |
| C1qa      | Fn1       | Cybb      |
| H2-Eb1    | Sell      | Il1b      |
| Cxcl16    | Chil3     | Cebpb     |
| Aif1      | S100a4    | Traf1     |
| H2-Ab1    | Crip1     | Gsr       |
| Cd74      | Ms4a4c    | Napsa     |
| H2-Aa     | Ifi205    | Gpr141    |
| Tmem176b  |           |           |
